# Supplementary material for: Examining the Reticulocyte Preference of Two Plasmodium berghei Strains during Blood-Stage Malaria Infection
Source: PubMed Central journal article supplement (PMC5826286; doi:10.3389/fmicb.2018.00166), 2018-02-20
Supplement: DataSheet1.pdf [file DataSheet1.pdf]

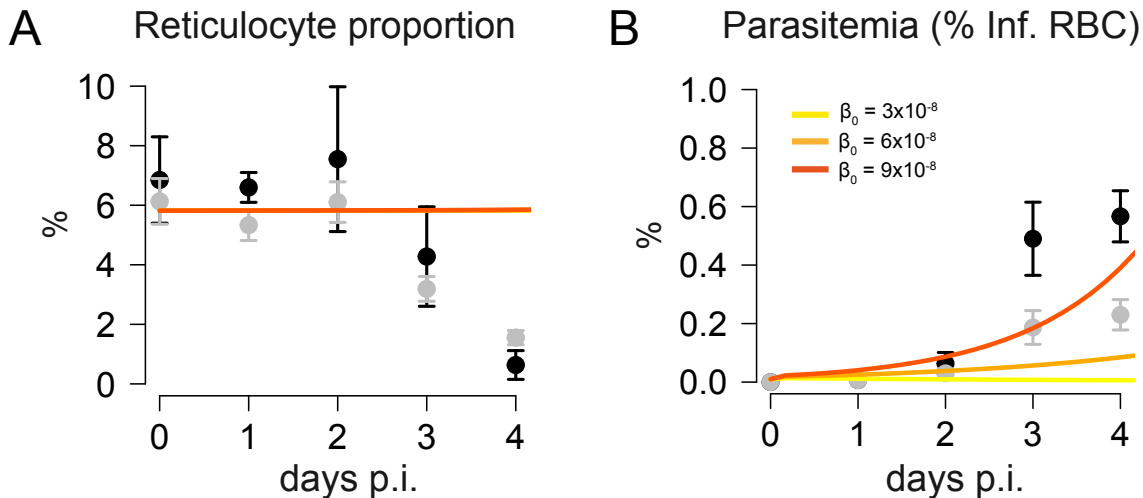

**Supplementary Figure S1:** Homeostatic erythropoiesis does not explain the observed dynamics in reticulocyte proportion and parasitemia. The observed dynamics of the proportion of reticulocytes (**A**) and parasitemia (**B**) for WT (*black*) and KO (*grey*) parasites are shown. Colored lines indicate the predictions by the mathematical model assuming normal erythropoietic feedback conditions as described by Eqs. (1)-(3) and Eqs. (4)-(8) in the manuscript with different values for the infection rate  $\beta_0$  (given in  $\text{mz}^{-1} \mu\text{l}^{-1} \text{h}^{-1}$ ). Such a model is not able to explain the simultaneous decrease in the reticulocyte proportion and increase in parasitemia around day 3 post infection.
