# Supplementary material for: Examining the Reticulocyte Preference of Two Plasmodium berghei Strains during Blood-Stage Malaria Infection
Source: PubMed Central journal article supplement (PMC5826286; doi:10.3389/fmicb.2018.00166), 2018-02-20
Supplement: DataSheet2.pdf [file DataSheet2.pdf]

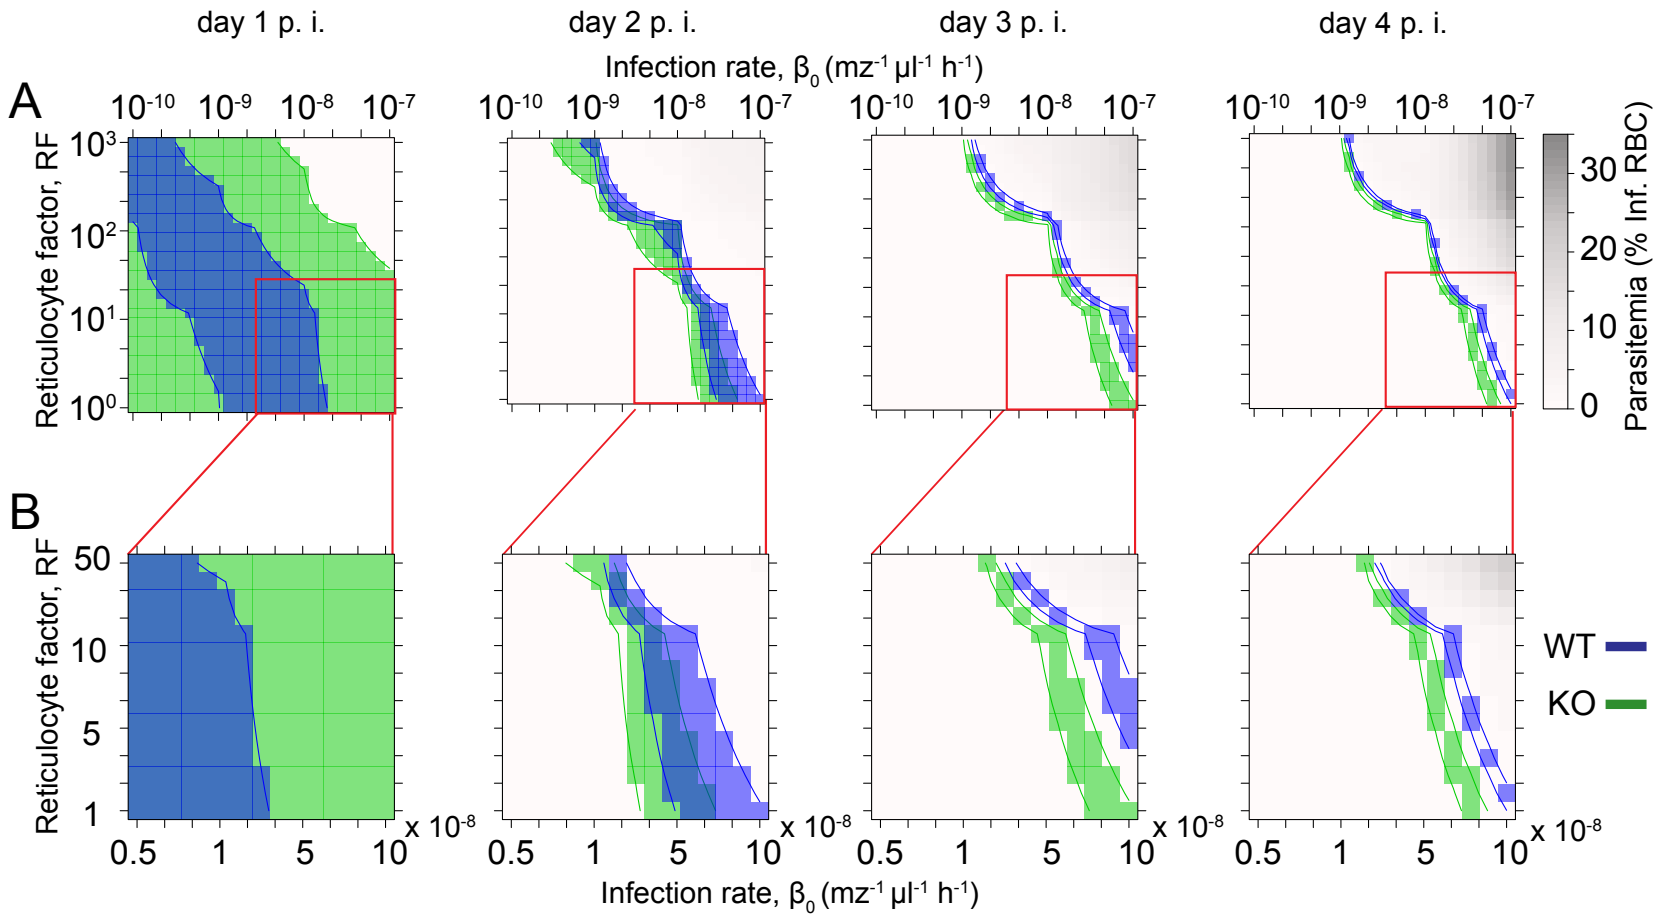

**Supplementary Figure S2:** Distinguishing between the infectivity of WT and KO parasites during different stages of infection. **(A)** The panels show possible combinations of the infection rate  $\beta_0$  and reticulocyte factor RF for WT (*blue*) and KO (*green*) parasites explaining the parasitemia level observed. While infectivity characteristics for both parasite strains overlap during early days post infection, later time points allow differing between the two strains. **(B)** Zoom into a particular region of **(A)** to improve visual clarity.
